# Supplementary material for: Low-dose suspended graphene oxide nanosheets induce antioxidant response and osteogenic differentiation of bone marrow-derived mesenchymal stem cellsviaJNK-dependent FoxO1 activation
Source: Royal Society of Chemistry journal article supplement (doi:10.1039/c9tb01413f), 2019-01-01
Supplement: c9tb01413f1.pdf [file c9tb01413f1.pdf]

## Supplementary Information

### Supplementary Figure 1

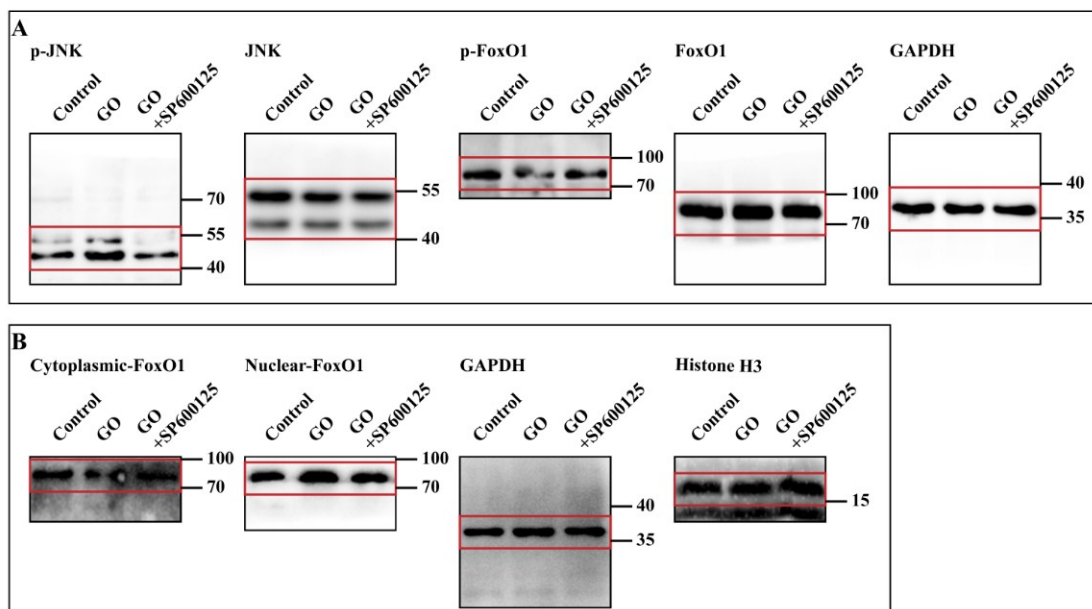

**Fig. S1** Uncropped western blot images of Figure 5. GO: graphene oxide; SP600125: JNK inhibitor.

### Supplementary Figure 2

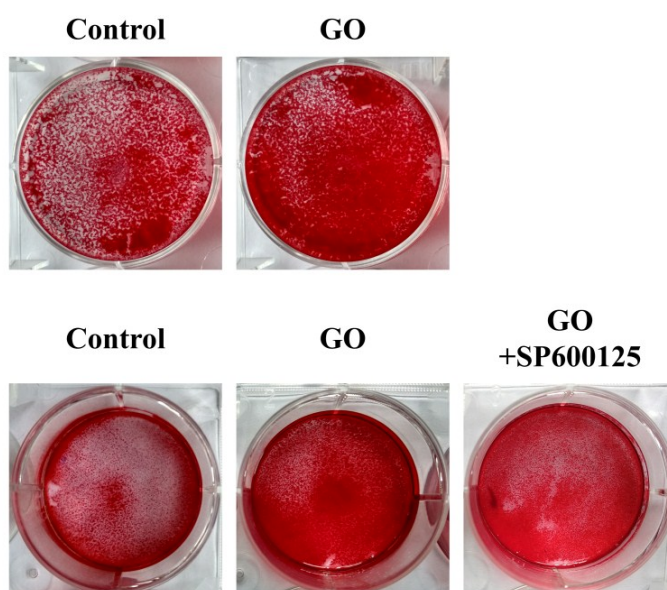

**Fig. S2** Uncropped alizarin red staining images of Figure 4 and Figure 6. GO: graphene oxide; SP600125: JNK inhibitor.
